RESEARCH ARTICLE

# Molecular Cloning, Characterization and Positively Selected Sites of the Glutathione S-Transferase Family from *Locusta migratoria*

Xueyao Zhang<sup>1</sup>\*, Jianxin Wang<sup>1</sup>\*, Min Zhang<sup>1</sup>, Guohua Qin<sup>1</sup>, Daqi Li<sup>1</sup>, Kun Yan Zhu<sup>2</sup>, Enbo Ma<sup>1\*</sup>, Jianzhen Zhang<sup>1\*</sup>

1. Research Institute of Applied Biology, Shanxi University, Taiyuan, Shanxi, China, 2. Department of Entomology, Kansas State University, Manhattan, Kansas, United States of America

\*maenbo2003@sxu.edu.cn (EM); zjz@sxu.edu.cn (JZ)

These authors contributed equally to this work.

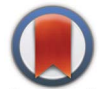

CrossMark  
click for updates

## OPEN ACCESS

**Citation:** Zhang X, Wang J, Zhang M, Qin G, Li D, et al. (2014) Molecular Cloning, Characterization and Positively Selected Sites of the Glutathione S-Transferase Family from *Locusta migratoria*. PLoS ONE 9(12): e114776. doi:10.1371/journal.pone.0114776

**Editor:** Joshua B. Benoit, University of Cincinnati, United States of America

**Received:** January 11, 2014

**Accepted:** November 13, 2014

**Published:** December 8, 2014

**Copyright:** © 2014 Zhang et al. This is an open-access article distributed under the terms of the [Creative Commons Attribution License](https://creativecommons.org/licenses/by/4.0/), which permits unrestricted use, distribution, and reproduction in any medium, provided the original author and source are credited.

**Funding:** This research was supported by the Funds for International Cooperation and Exchange of the National Natural Science Foundation of China (31320103921), the National Natural Science Foundation of China (Grant No. 31101463, 31201545, 31201548), Research Fund for the Doctoral Program of Higher Education of China (Grant No. 20111401120009, 20111401110006), Shanxi Province Science Foundation for Youths (Grant No. 2012021027-1). The funders had no role in study design, data collection and analysis, decision to publish, or preparation of the manuscript.

**Competing Interests:** The authors have declared that no competing interests exist.

## Abstract

Glutathione S-transferases (GSTs) are multifunctional enzymes that are involved in the metabolism of endogenous and exogenous compounds and are related to insecticide resistance. The purpose of this study was to provide new information on the molecular characteristics and the positive selection of locust GSTs. Based on the transcriptome database, we sequenced 28 cytosolic GSTs and 4 microsomal GSTs from the migratory locust (*Locusta migratoria*). We assigned the 28 cytosolic GSTs into 6 classes—sigma, epsilon, delta, theta, omega and zeta, and the 4 microsomal GSTs into 2 subclasses—insect and MGST3. The tissue- and stage-expression patterns of the GSTs differed at the mRNA level. Further, the substrate specificities and kinetic constants of the cytosolic GSTs differed markedly at the protein level. The results of likelihood ratio tests provided strong evidence for positive selection in the delta class. The result of Bayes Empirical Bayes analysis identified 4 amino acid sites in the delta class as positive selection sites. These sites were located on the protein surface. Our findings will facilitate the elucidation of the molecular characteristics and evolutionary aspects of insect GST superfamily.

## Introduction

The migratory locust (*Locusta migratoria*) is an important agricultural pest in East and South Asia and the Pacific Region. The locust has developed insecticide resistance because of frequent applications of insecticides. Increased glutathione

S-transferase (GST, EC 2.5.1.18) activity has been reported to be one of the main reasons for the resistance in *L. migratoria* [1].

The GSTs constitute a superfamily of multifunctional proteins found in most aerobic prokaryotes and eukaryotes [2,3]. GSTs catalyze the conjugation of glutathione (GSH) to electrophilic compounds, which are involved in detoxification of endogenous and xenobiotic compounds [4,5]. Some GSTs also have GSH-dependent peroxidase, isomerase, thiol transferase, dehydroascorbate reductase, and non-catalytically binding activities [6]. They participate in endogenous metabolism or regulation of physiological function *in vivo*. In insects, the GST superfamily consists of 2 major classes, namely, cytosolic (soluble) and microsomal GSTs. The latter are also known as membrane-associated proteins in eicosanoid and glutathione metabolism (MAPEG).

Based on the sequence identity, substrate specificity, and immunological properties, insect cytosolic GSTs are assigned into at least 7 distinct classes, namely delta, epsilon, sigma, omega, theta, zeta, and unknown [7]. The delta and epsilon classes are insect-specific GST classes, and are involved in detoxification of insecticides. The epsilon GSTs of *Anopheles gambiae* play a role in response to oxidative stress, by catalyzing the dehydrochlorination of DDT to yield DDE, thereby conferring resistance to DDT [8]. Enhanced transcription of delta GSTs from *Sarcoptes scabiei* is related to permethrin resistance [9]. Sigma GSTs are induced by oxidative stress and also participate in the detoxification and multi-bioprocesses, such as detoxification of epoxides, peroxides and 4-HNE, and response to carbaryl [10], mercury [11] and bacterial [12]. Sigma GSTs are also involved in isomerization of PGH<sub>2</sub> to PGD<sub>2</sub> [13]. Zeta GSTs catalyze the isomerization of maleylacetoacetate, and play important roles in catabolism of phenylalanine and tyrosine [14].

Microsomal GSTs are classified into 6 classes, namely class 1 (MGST1, insect, and PGES1 subclasses), class 2 (MGST2, LTC<sub>4</sub>S, and FLAP subclasses), class 3 (MGST3 subclass), *Synechocystis* class, *E. coli* class, and bacteria class [15,16]. Microsomal GSTs play a major role in the biosynthesis of prostaglandins and leukotrienes, and are also involved in the detoxification of xenobiotics and protection against oxidative damage [16]. MGST1 is involved in the detoxification of toxic or carcinogenic substances and protection against oxidative stress [17,18]. PGES1 functions downstream of cyclooxygenase, and catalyzes the isomerization of PGH<sub>2</sub> to PGE<sub>2</sub> under basal and inflammatory conditions [19,20]. MGST3 catalyzes the conjugation of GSH and LTA<sub>4</sub> to form LTC<sub>4</sub>, and the reduction of 5S-hydroperoxy-6*t*,8*c*,11*c*,14*c*-eicosatetraenoic acid (5-HPETE) to 5S-hydroxy- eicosatetraenoic acid (5-HETE) in the leukotriene synthesis pathway [21].

We previously identified 10 cytosolic GSTs from *L. migratoria* and assigned these GSTs into sigma, delta, theta, and unknown classes. We further showed that the sigma GSTs participated in carbaryl and malathion detoxification, whereas the delta GSTs were involved in the detoxification of carbaryl and chlorpyrifos [2]. However, to date, few systematic studies regarding the characterization of GSTs from *L. migratoria* have been performed. The goal of the study was to provide new

information on the GSTs from *L. migratoria* and help researchers uncover the molecular characteristics and evolutionary aspects of insect GSTs.

In the present study, we sequenced and classified 32 full-length GST sequences from *L. migratoria*, and analyzed their tissue- and stage-dependent expression patterns by using real time quantitative PCR (RT-qPCR). We heterologously expressed 25 of these GST genes by using *E. coli* expression system. We purified the GSTs by using NTA-Ni<sup>2+</sup> affinity chromatography. Finally, we identified positive selection sites of the GSTs by using the branch model, site model, and Bayes empirical Bayes (BEB) methods, and labeled these sites by using 3-dimensional homology models. Our findings will facilitate the elucidation of the molecular characteristics and evolutionary history of insect GSTs.

## Materials and Methods

### Reagents and assay kits

RevertAid H minus reverse transcriptase was purchased from Fermentas (Waltham, MA, USA). Fastpfu DNA polymerase and the pEASY-Blunt zero cloning kit were obtained from Transgen Biotech Co. Ltd. (Beijing, China). The SMARTer RACE cDNA amplification kit and the His60 Ni Superflow resin were purchased from Clontech (Palo Alto, CA, USA). The substrates of GSTs, 2,4-dinitrochlorobenzene (CDNB), 2,4-dinitrofluorobenzene (FDNB), 3,4-dichloronitrobenzene (DCNB), 4-chloro-7-nitrobenzofurazan (NBD-Cl), 4-nitrobenzyl chloride (pNBC), 4-nitrophenethyl bromide (pNPB), and reduced glutathione (GSH) were from Sigma (St. Louis, MO). All other reagents used were of the highest grade commercially available.

### Molecular cloning and phylogenetic analysis

Total RNA was extracted by using TRIzol (TaKaRa, Japan), and mRNA was subsequently isolated by using the PolyATtract mRNA isolation systems. The cDNA was synthesized by using the SMARTer RACE cDNA amplification kit. RACE PCR was performed by using Fastpfu DNA polymerase, according to the manufacturer's instructions. The PCR product was subcloned into the pEASY-Blunt zero vector and sequenced by Sangon Biotech (Shanghai, China). The phylogenetic tree was constructed based on full-length DNA sequences, by using the neighbor-joining algorithm with mega 5.0 software.

### Analysis of tissue- and stage-dependent expression patterns

For the tissue-specific expression profile analysis, we dissected 12 different tissues, including the foregut, midgut, hindgut, gastric caecum, Malpighian tubules, cuticle, spermary, ovary, trachea, fat bodies, antenna, and muscles (from legs and back) from adult individuals of *L. migratoria*. For the stage-specific expression profile analysis, we collected whole bodies of *L. migratoria* individuals at 8 different developmental stages, including the egg (5 days and 10 days), and the 1st,

2nd, 3rd, 4th, and 5th-instar nymphs and adults. We extracted total RNA from these samples, and used 4  $\mu\text{g}$  total RNA to synthesize cDNA, by using oligo-d(T) and RevertAid H minus reverse transcriptase. The primers used for RT-qPCR analysis are shown in [S1 Table](#). The thermal cycling profile consisted of two steps, including 94°C for 5 s, 60°C for 31 s, followed by melting curve analysis. The fluorescence intensity was monitored during each annealing step. Relative transcript levels were determined by using the double standard curve method with  *$\beta$ -actin* as a reference gene. The experiment was repeated with 3 biological replicates, each with 2 technical replicates. All data were analyzed by the one-way ANOVA, LSD test.

### Protein expression and enzymatic activity assay

The open reading frames of the GSTs were subcloned into the pET28a vector, and the recombinant vectors were used to transform *E. coli* BL21 (DE3). The recombinant GSTs were induced by using 1 mM isopropyl- $\beta$ -D-thiogalactopyranoside (IPTG) at 25°C, and purified by using NTA-Ni<sup>2+</sup>-affinity chromatography. The enzymatic activities were measured spectrophotometrically, as described previously [3]. The protein concentration was determined by using the BCA method with BSA as the standard protein.

### Homology structure modeling

The sequence of LmGSTD1 as a target sequence was submitted to BLASTP program (<http://blast.ncbi.nlm.nih.gov/>). Then the program searched against Protein Database (PDB) of known protein structures, and then the X-ray structure of Delta GST (3EIN) from *Drosophila melanogaster* were selected as template structure. Finally, the homology model of LmGSTD1 was generated by MODELLER 9v12 through comparative protein structure prediction [22].

### Positive selection site analysis

To investigate the selective pressure among phylogenies, we used the branch model of the PAML package [23]. The simplest model (one-ratio) assumes a single  $\omega$  for the entire tree, whereas the most general model (free-ratio) assumes a  $\omega$  for each branch. To determine whether positive selection had acted on specific amino acid sites of the GSTs, we explored 5 models of CODEML [24]—the one-ratio model (M0), nearly neutral model (M1a), positive-selection model (M2a), beta model (M7), and beta and  $\nu$  model (M8). We conducted two likelihood ratio tests (LRTs), which compared M1a with M2a, and M7 with M8, to verify whether the difference ratio  $\omega$  differed significantly from 1 for each pairwise comparison. The LRT compared the likelihood scores of the pairwise models, with the constraint of  $\omega=1$ , and without such constraint:  $\text{LR}=2|\ln 1-\ln 2|$ . If the LRT was significant, we used the BEB [25] method to identify positive selection sites in the alignments. Finally, we labeled the positive selection sites on the homology structure of the corresponding GSTs.

## Results

### Identification of GST genes from *L. migratoria*

Based on the transcriptome of *L. migratoria* ([S1 Data](#)), we identified candidate GST gene fragments by keyword searching. We subsequently cloned 28 cytosolic GSTs and 4 microsomal GSTs from *L. migratoria*, including 10 known cytosolic GST genes of *L. migratoria* ([S2 Data](#), [Table 1](#)), by using RACE PCR. The estimated numbers of GSTs may be lower than the actual numbers of GSTs in the locust genome, because of the limitations of transcriptome technology. However, our data are in good agreement with the number of GSTs in the genome of *L. migratoria* (28 cytosolic GSTs) [[26](#)], implying that almost all of the cytosolic GST genes of *L. migratoria* were detected based on the transcriptome, and were identified and sequenced by using RACE PCR.

With the exception of *LmGSTe2* and *LmGSTe3*, the cytosolic GSTs of *L. migratoria* had an acidic theoretical pI, and a relatively high molecular mass (22.1–27.0 kDa) ([Table 1](#)). To enhance the accuracy of our phylogenetic tree, we retrieved >130 known GST sequences of the representative insects ([S3 Data](#)). Based on sequence similarity, the results of our phylogenetic analysis identified 28 cytosolic GSTs, belonging to 6 different cytosolic classes—sigma, epsilon, delta, omega, theta, and zeta ([Fig. 1](#), [S2 Table](#)). It was shown that each class of GSTs from most insects clustered in a single clade with a high bootstrap value, thereby further supporting the classification of the *L. migratoria* GSTs. The sigma GSTs were most numerous (10 members), and were followed by the delta and epsilon GSTs (7 and 5 members, respectively), the omega and theta GSTs (3 and 2 members, respectively), and the zeta class (1 member). The former unclassified GST (*LmGSTu1*) was reassigned with high confidence into the delta class (*LmGSTd6*). Furthermore, 9 of the 10 sigma GSTs contained a class-specific Tyr9 residue in the G-site; the omega GSTs had an ancestral Cys9 residue; and the zeta, theta, and delta GSTs contained a conserved Ser in the G-site ([S1 Figure](#)).

On the other hand, the 4 microsomal GSTs had an alkaline theoretical pI and a relatively low molecular mass (14.2–17.9 kDa, [Table 1](#)). The secondary structure prediction indicated that the 4 microsomal GSTs consisted of 3 or 4 transmembrane regions ([S2 Figure](#)). To construct our phylogenetic tree, we retrieved >100 known microsomal GSTs from GenBank [[15](#)] ([S4 Data](#)). Based on high bootstrap support, we clearly identified 9 subclasses of microsomal GSTs ([Fig. 2](#)). Among these, 3 microsomal GSTs (*LmGSTm1*, *LmGSTm2*, and *LmGSTm3*) were classified into class 1 (insect subclass), and *LmGSTm4* was assigned into class 3 (MGST3 subclass). To the best of our knowledge, our study is the first to report an insect GST (namely, *LmGSTm4*) as a member of the MGST3 subclass.

### Analysis of tissue- and stage-dependent expression patterns

Our RT-qPCR analyses showed that the tissue-expression patterns of GSTs could be divided into 3 types, including wide-expression, partial-expression, and

**Table 1.** Summary of the character of GST gene from *L. migratoria*.

| GSTs Genes      | GenBank Accession No. | ORF(bp) | Deduced amino acid residues | Predicted MM(kD) | Theoretical pI |
|-----------------|-----------------------|---------|-----------------------------|------------------|----------------|
| <i>LmGSTs1</i>  | AEB91973.1            | 615     | 204                         | 23.64            | 5.46           |
| <i>LmGSTs2</i>  | AEB91974.1            | 615     | 204                         | 23.14            | 6.62           |
| <i>LmGSTs3</i>  | AEB91975.1            | 615     | 204                         | 23.40            | 7.62           |
| <i>LmGSTs4</i>  | AEB91976.1            | 615     | 204                         | 22.92            | 8.42           |
| <i>LmGSTs5</i>  | AEB91977.1            | 609     | 202                         | 23.10            | 5.72           |
| <i>LmGSTs6</i>  | AEB91978.1            | 579     | 192                         | 22.10            | 6.74           |
| <i>LmGSTs7</i>  | AEB91979.1            | 615     | 204                         | 23.43            | 7.58           |
| <i>LmGSTs8</i>  | AHC08043.1            | 615     | 204                         | 23.58            | 5.78           |
| <i>LmGSTs9</i>  | AHC08044.1            | 615     | 204                         | 23.47            | 6.19           |
| <i>LmGSTs10</i> | AHC08045.1            | 615     | 204                         | 23.68            | 5.82           |
| <i>LmGSTo1</i>  | AHC08060.1            | 729     | 242                         | 26.96            | 5.73           |
| <i>LmGSTo2</i>  | AFK10494.1            | 738     | 245                         | 29.02            | 6.97           |
| <i>LmGSTo3</i>  | AHC08062.1            | 726     | 241                         | 26.92            | 6.45           |
| <i>LmGSTd1</i>  | ADR30117.1            | 657     | 218                         | 24.82            | 5.57           |
| <i>LmGSTd2</i>  | AHC08055.1            | 645     | 214                         | 24.11            | 7.66           |
| <i>LmGSTd3</i>  | AHC08056.1            | 669     | 222                         | 25.34            | 5.21           |
| <i>LmGSTd4</i>  | AHC08057.1            | 657     | 218                         | 25.06            | 6.89           |
| <i>LmGSTd5</i>  | AHC08058.1            | 675     | 224                         | 25.74            | 5.98           |
| <i>LmGSTd6</i>  | AEB91972.1            | 645     | 214                         | 24.30            | 7.76           |
| <i>LmGSTd7</i>  | AHC08059.1            | 702     | 233                         | 26.09            | 6.08           |
| <i>LmGSTe1</i>  | AHC08046.1            | 669     | 222                         | 24.76            | 6.22           |
| <i>LmGSTe2</i>  | AHC08047.1            | 465     | 154                         | 16.76            | 5.56           |
| <i>LmGSTe3</i>  | AHC08048.1            | 465     | 154                         | 16.80            | 5.40           |
| <i>LmGSTe4</i>  | AHC08049.1            | 666     | 221                         | 24.36            | 5.22           |
| <i>LmGSTe5</i>  | AHC08050.1            | 666     | 221                         | 24.51            | 5.76           |
| <i>LmGSTt1</i>  | AEB91980.1            | 696     | 231                         | 26.60            | 7.63           |
| <i>LmGSTt2</i>  | AHC08064.1            | 696     | 231                         | 26.80            | 8.33           |
| <i>LmGSTz1</i>  | AHC08063.1            | 654     | 217                         | 24.95            | 8.15           |
| <i>LmGSTm1</i>  | AHC08051.1            | 459     | 152                         | 17.09            | 9.94           |
| <i>LmGSTm2</i>  | AHC08052.1            | 486     | 161                         | 17.93            | 9.42           |
| <i>LmGSTm3</i>  | AHC08053.1            | 375     | 124                         | 14.19            | 9.82           |
| <i>LmGSTm4</i>  | AHC08054.1            | 420     | 139                         | 15.29            | 9.68           |

doi:10.1371/journal.pone.0114776.t001

specific-expression (Fig. 3A). We observed that 13 GST genes (*LmGSTs1*, *LmGSTs2*, *LmGSTs4*, *LmGSTs6*, *LmGSTs7*, *LmGSTs8*, *LmGSTs9*, *LmGSTo1*, *LmGSTo2*, *LmGSTd4*, *LmGSTe2*, *LmGSTe5*, and *LmGSTm3*) were widely expressed in  $\geq 6$  tissues ( $P < 0.05$ ). In comparison, 12 GSTs (*LmGSTs3*, *LmGSTs10*, *LmGSTd1*, *LmGSTd2*, *LmGSTd5*, *LmGSTd6*, *LmGSTd7*, *LmGSTe1*, *LmGSTe3*, *LmGSTe4*, *LmGSTt2*, and *LmGSTm2*), had relatively narrow tissue-expression ranges ( $P < 0.05$ ). Moreover, *LmGSTt1* was specifically located in the muscles and



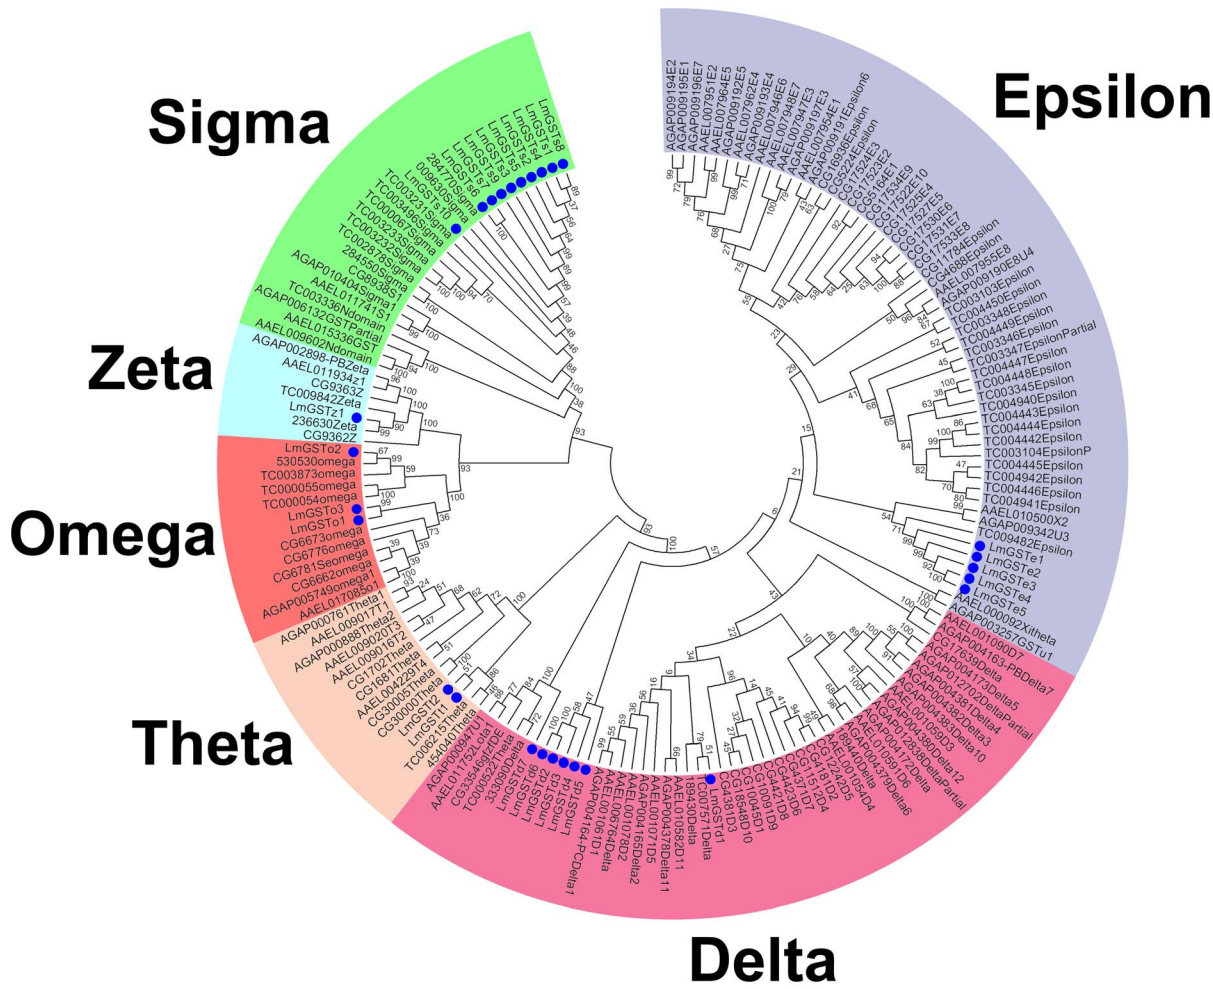

**Fig. 1. Phylogenetic analysis of cytosolic GSTs from *L. migratoria* and representative insect species.** The bootstrap neighbor-joining tree was generated using MEGA from ClustalW alignments. Branch numbers represent bootstrap values (1000 replicates). The 28 *L. migratoria* GSTs are marked with filled circles. The sequences used to reconstruct the NJ tree are available as [S3 Data](#).

doi:10.1371/journal.pone.0114776.g001

spermary ( $P < 0.05$ ), whereas *LmGSTz1*, *LmGSTm1*, and *LmGSTm4* were mainly expressed in the trachea, spermary, and muscles, respectively ( $P < 0.05$ ).

The results of stage-dependent expression pattern analysis revealed that the GSTs could be classified into 2 groups, including the egg stage-expression group, and the nymph and adult stages-expression group (Fig. 3B). We observed that 12 GSTs (*LmGSTd1*, *LmGSTd3*, *LmGSTd5*, *LmGSTd7*, *LmGSTe2*, *LmGSTe3*, *LmGSTe4*, *LmGSTe5*, *LmGSTs3*, *LmGSTs8*, *LmGSTo1*, and *LmGSTz1*) showed relatively high expression in the egg stage ( $P < 0.05$ ). Among these, 7 GSTs (*LmGSTd1*, *LmGSTd3*, *LmGSTd5*, *LmGSTe2*, *LmGSTe4*, *LmGSTs3*, and *LmGSTs8*) showed a high expression level in the early egg stage (Fig. 3C) ( $P < 0.05$ ), 1 GST (*LmGSTo1*) was primarily expressed in the late egg stage, and 3 GSTs (*LmGSTd7*, *LmGSTe3*, and *LmGSTe5*) were expressed in the early and late egg stages ( $P < 0.05$ ). The remaining GSTs were mainly expressed in the nymphal and adult

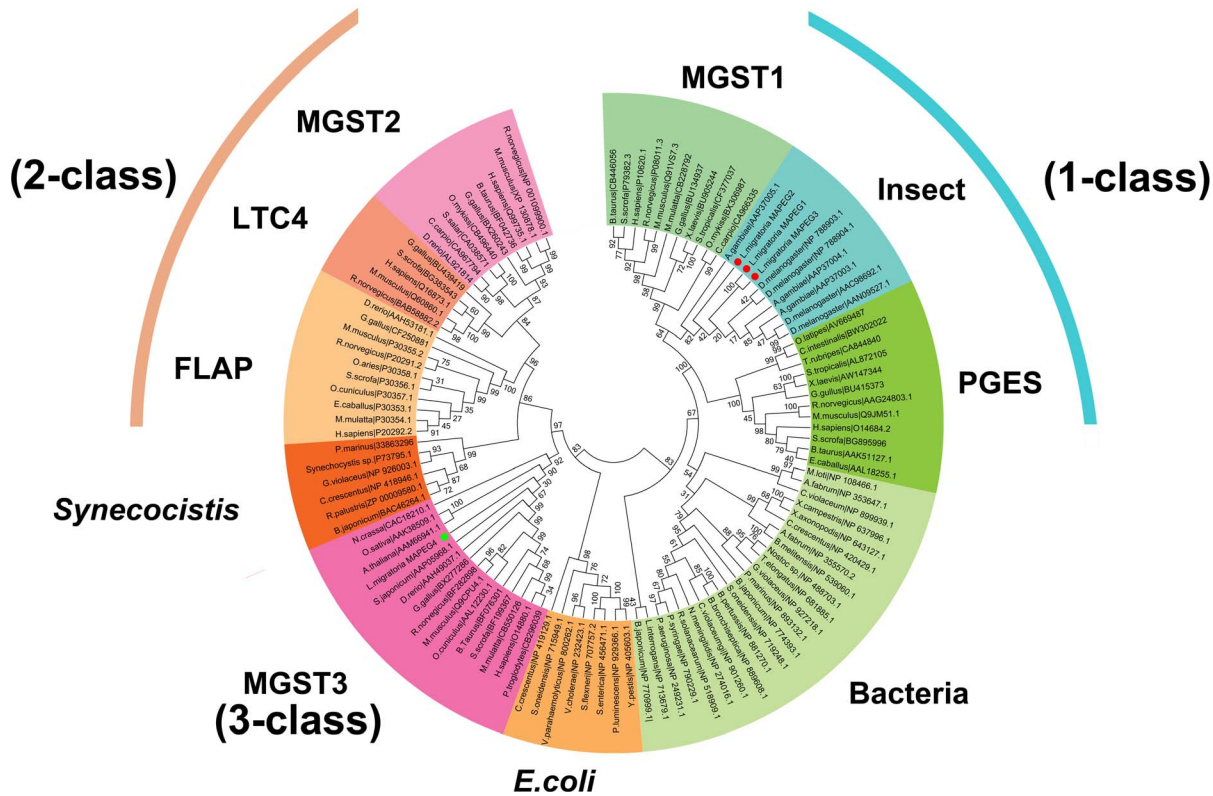

**Fig. 2. Phylogenetic analysis of microsomal GSTs from *L. migratoria* and representative insect species.** The bootstrap neighbor-joining tree was generated using MEGA from ClustalW alignments. Branch numbers represent bootstrap values (1000 replicates). The four *L. migratoria* GSTs are marked with red circle and green square, respectively. The species names and amino acid sequences used to reconstruct the NJ tree are available as [S4 Data](#).

doi:10.1371/journal.pone.0114776.g002

stages. The different mRNA expression patterns within each GST class may suggest different roles of these genes in different stages and tissues.

### Enzymatic properties of recombinant GSTs from *L. migratoria*

The locust GSTs were selected for protein expression and purification. Most of the GSTs were successfully purified by using a Ni<sup>2+</sup>-NTA column. The exceptions were 4 microsomal GSTs, 1 sigma GST (*LmGSTs6*) and 2 epsilon GSTs (*LmGSTe2* and *LmGSTe3*). However, the reason for the no-expression of these genes is unclear.

In order to explain the possible relationships between the catalytic activity and substrate diversity, we determined the substrate specificity of the recombinant locust GSTs toward 6 electrophilic substrates, including CDNB, FDNB, DCNB, NDB-Cl, pNPC, and pNPB ([Table 2](#)). We observed that all the 25 purified cytosolic GSTs showed activity toward CDNB, FDNB, and NDB-Cl; 19 of the purified cytosolic GSTs showed activity towards DCNB (the exceptions being the 3 omega and 1 zeta GSTs, and 2 of the sigma GSTs (*LmGSTs10* and *LmGSTs2*); 8 GSTs were able to catalyze pNPB (the exceptions being the 9 sigma, 3 omega, 4



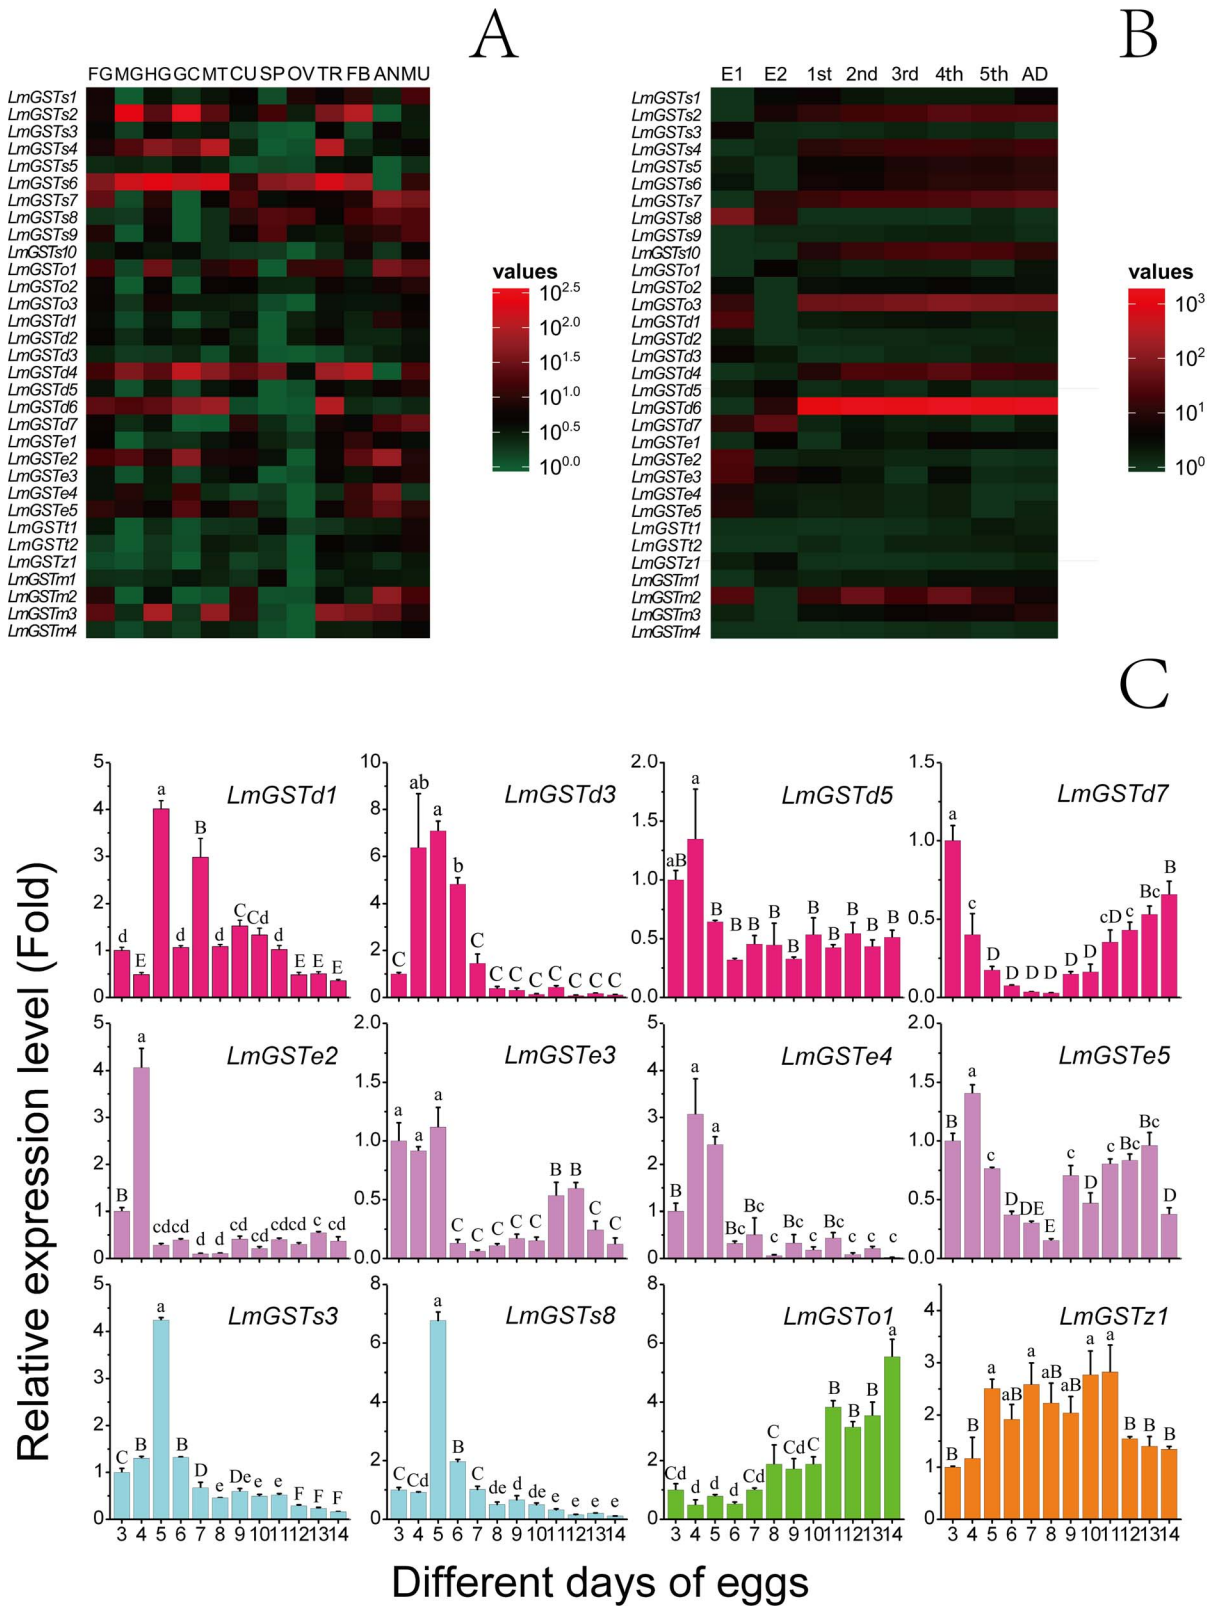

**Fig. 3. Expression patterns of GST genes from *L. migratoria*.** (A) Tissue-specific expression patterns of GST genes as evaluated using RT-qPCR: foregut (FG), midgut (MG), hindgut (HG), gastric caecum (GC), Malpighian tubules (MT), cuticle (CU), spermary (SP), ovary (OV), trachea (TR), fat bodies (FB), anterior (AN) and muscles (MU). (B) Developmental stage-specific expression patterns of GST genes as evaluated using RT-qPCR: 5-day and 10-day eggs (E1 and E2), first-(1st), second-(2nd), third-(3rd), fourth-(4th) and fifth-(5th) instar nymphs and adults (AD). The  $\beta$ -actin gene was used as a reference gene. For each gene, relative expression levels are shown with the highest as red and the lowest as green. (C) Relative expression levels of GST genes in egg stage as determined by RT-qPCR.  $\beta$ -actin was used as a reference gene. Data are expressed as means  $\pm$  SE of three biological replications. Small letters and capital letters indicate significant differences at  $p < 0.05$  and  $p < 0.01$  level, according to ANOVA and LSD test, respectively.

doi:10.1371/journal.pone.0114776.g003

delta and 1 zeta GSTs); and 18 GSTs were capable of catalyzing pNPC, (the exceptions being the 3 omega and 1 zeta GSTs, and 3 sigma GSTs).

We determined the kinetic constants of the 25 GSTs, by using CDNB and GSH as substrates (Table 3). The apparent  $K_m^{CDNB}$  varied  $< 70$ -fold among the GST classes (61.5-fold among the delta class, 28.1-fold among the sigma class, 14.6-fold among the epsilon class, and 3.9-fold among the omega class). By contrast, the catalytic efficiency ( $k_{cat}/K_m$ ) of CDNB differed markedly among the GST classes

**Table 2.** Specific activity of the GSTs from *L. migratoria* toward six substrates.

| Enzyme   | CDNB (0.1 mM)      | FNDB (1.0 mM)       | DCNB (1.0 mM)     | NDB-Cl (0.5 mM)    | pNPB (0.25 mM)    | pNPC (0.5 mM)      |
|----------|--------------------|---------------------|-------------------|--------------------|-------------------|--------------------|
| LmGSTD1  | 17.893 $\pm$ 0.578 | 125.035 $\pm$ 5.295 | 0.098 $\pm$ 0.002 | 55.439 $\pm$ 1.897 | ND                | 0.611 $\pm$ 0.033  |
| LmGSTD2  | 0.534 $\pm$ 0.174  | 110.065 $\pm$ 3.135 | 0.286 $\pm$ 0.007 | 48.627 $\pm$ 0.662 | ND                | 0.158 $\pm$ 0.008  |
| LmGSTD3  | 0.077 $\pm$ 0.001  | 1.563 $\pm$ 0.067   | 0.023 $\pm$ 0.001 | 2.293 $\pm$ 0.046  | 0.032 $\pm$ 0.000 | 0.051 $\pm$ 0.001  |
| LmGSTD4  | 5.508 $\pm$ 0.099  | 5.019 $\pm$ 0.265   | 0.661 $\pm$ 0.033 | 3.327 $\pm$ 0.151  | 0.072 $\pm$ 0.006 | 0.933 $\pm$ 0.035  |
| LmGSTD5  | 3.003 $\pm$ 0.113  | 2.276 $\pm$ 0.103   | 0.101 $\pm$ 0.004 | 1.897 $\pm$ 0.042  | ND                | 0.152 $\pm$ 0.014  |
| LmGSTD6  | 8.530 $\pm$ 0.153  | 76.387 $\pm$ 1.913  | 0.776 $\pm$ 0.016 | 22.999 $\pm$ 1.055 | ND                | 0.147 $\pm$ 0.005  |
| LmGSTD7  | 1.024 $\pm$ 0.020  | 50.901 $\pm$ 1.325  | 0.004 $\pm$ 0.001 | 2.379 $\pm$ 0.073  | 0.362 $\pm$ 0.017 | 0.669 $\pm$ 0.060  |
| LmGSTE1  | 10.286 $\pm$ 0.209 | 0.509 $\pm$ 0.049   | 8.811 $\pm$ 0.094 | 5.953 $\pm$ 0.132  | 0.445 $\pm$ 0.040 | 24.318 $\pm$ 0.635 |
| LmGSTE4  | 43.716 $\pm$ 0.758 | 31.436 $\pm$ 0.717  | 5.579 $\pm$ 0.083 | 16.714 $\pm$ 0.260 | 0.068 $\pm$ 0.006 | 7.187 $\pm$ 0.156  |
| LmGSTE5  | 14.806 $\pm$ 0.284 | 21.923 $\pm$ 0.786  | 8.672 $\pm$ 0.290 | 1.830 $\pm$ 0.057  | 0.136 $\pm$ 0.001 | 1.605 $\pm$ 0.019  |
| LmGSTS1  | 0.069 $\pm$ 0.003  | 1.162 $\pm$ 0.035   | 0.006 $\pm$ 0.001 | 0.503 $\pm$ 0.018  | ND                | 0.210 $\pm$ 0.003  |
| LmGSTS2  | 0.007 $\pm$ 0.000  | 1.640 $\pm$ 0.069   | ND                | 0.153 $\pm$ 0.011  | ND                | ND                 |
| LmGSTS3  | 2.407 $\pm$ 0.050  | 18.730 $\pm$ 1.817  | 0.018 $\pm$ 0.003 | 1.302 $\pm$ 0.001  | ND                | ND                 |
| LmGSTS4  | 0.075 $\pm$ 0.002  | 8.000 $\pm$ 0.144   | 0.005 $\pm$ 0.001 | 1.173 $\pm$ 0.021  | ND                | 0.180 $\pm$ 0.050  |
| LmGSTS5  | 4.230 $\pm$ 0.128  | 15.044 $\pm$ 1.018  | 0.022 $\pm$ 0.001 | 3.901 $\pm$ 0.315  | ND                | ND                 |
| LmGSTS7  | 0.360 $\pm$ 0.007  | 0.417 $\pm$ 0.026   | 0.042 $\pm$ 0.001 | 0.061 $\pm$ 0.005  | ND                | 0.576 $\pm$ 0.047  |
| LmGSTS8  | 0.090 $\pm$ 0.004  | 1.998 $\pm$ 0.134   | 0.006 $\pm$ 0.001 | 0.343 $\pm$ 0.008  | ND                | 0.094 $\pm$ 0.009  |
| LmGSTS9  | 0.829 $\pm$ 0.039  | 14.627 $\pm$ 0.561  | 0.101 $\pm$ 0.003 | 1.096 $\pm$ 0.015  | ND                | 0.081 $\pm$ 0.007  |
| LmGSTS10 | 0.167 $\pm$ 0.006  | 20.003 $\pm$ 1.395  | ND                | 0.563 $\pm$ 0.019  | ND                | 5.113 $\pm$ 0.149  |
| LmGSTT1  | 0.075 $\pm$ 0.003  | 1.474 $\pm$ 0.042   | 0.011 $\pm$ 0.001 | 0.171 $\pm$ 0.004  | 0.334 $\pm$ 0.029 | 3.267 $\pm$ 0.027  |
| LmGSTT2  | 0.548 $\pm$ 0.013  | 8.584 $\pm$ 0.111   | 0.013 $\pm$ 0.002 | 1.446 $\pm$ 0.027  | 1.681 $\pm$ 0.124 | 19.611 $\pm$ 0.469 |
| LmGSTO1  | 0.002 $\pm$ 0.000  | 0.260 $\pm$ 0.014   | ND                | 0.339 $\pm$ 0.010  | ND                | ND                 |
| LmGSTO2  | 0.012 $\pm$ 0.001  | 0.493 $\pm$ 0.064   | ND                | 0.385 $\pm$ 0.001  | ND                | ND                 |
| LmGSTO3  | 0.005 $\pm$ 0.000  | 1.211 $\pm$ 0.056   | ND                | 0.202 $\pm$ 0.011  | ND                | ND                 |
| LmGSTZ1  | 0.036 $\pm$ 0.001  | 0.327 $\pm$ 0.032   | ND                | 0.206 $\pm$ 0.003  | ND                | ND                 |

The experiment was performed at least five times and the results shown are mean  $\pm$  SD. ND, No detectable activity.

doi:10.1371/journal.pone.0114776.t002

**Table 3.** Steady state kinetic constants of the GSTs from *L. migratoria*.

| Enzyme   | $K_m^{CDNB}$ (mM) | $K_{cat}^{CDNB}$ ( $s^{-1}$ ) | $(K_{cat}/K_m)^{CDNB}$ ( $mM^{-1}\cdot s^{-1}$ ) | $K_m^{GSH}$ (mM) | $K_{cat}^{GSH}$ ( $s^{-1}$ ) | $(K_{cat}/K_m)^{GSH}$ ( $mM^{-1}\cdot s^{-1}$ ) |
|----------|-------------------|-------------------------------|--------------------------------------------------|------------------|------------------------------|-------------------------------------------------|
| LmGSTD1  | 0.139 ± 0.008     | 9,842.92                      | 70,740.17                                        | 0.507 ± 0.025    | 42,664.26                    | 84,142.21                                       |
| LmGSTD2  | 0.923 ± 0.049     | 89,358.34                     | 96,831.84                                        | 0.226 ± 0.012    | 121,069.26                   | 535,015.42                                      |
| LmGSTD3  | 0.102 ± 0.010     | 99.08                         | 976.10                                           | 1.977 ± 0.042    | 426.19                       | 215.52                                          |
| LmGSTD4  | 0.015 ± 0.002     | 3,005.67                      | 195,684.54                                       | 0.356 ± 0.032    | 3,178.80                     | 8936.70                                         |
| LmGSTD5  | 0.021 ± 0.001     | 13,546.21                     | 659,253.89                                       | 1.595 ± 0.070    | 10,750.18                    | 6,741.26                                        |
| LmGSTD6  | 0.528 ± 0.301     | 12,675.08                     | 24,023.99                                        | 1.031 ± 0.069    | 35,147.86                    | 34,096.99                                       |
| LmGSTD7  | 0.492 ± 0.039     | 2,881.65                      | 5,856.92                                         | 0.348 ± 0.012    | 2,648.66                     | 7,603.34                                        |
| LmGSTE1  | 0.007 ± 0.001     | 13,741.51                     | 1,937,102.02                                     | 1.404 ± 0.099    | 41,709.13                    | 29,702.53                                       |
| LmGSTE4  | 0.102 ± 0.008     | 33,317.71                     | 326,081.31                                       | 1.239 ± 0.070    | 33,523.92                    | 27,058.36                                       |
| LmGSTE5  | 0.026 ± 0.002     | 8,356.89                      | 324,916.19                                       | 1.961 ± 0.058    | 9,271.29                     | 4,728.43                                        |
| LmGSTS1  | 0.226 ± 0.014     | 328.27                        | 1,451.66                                         | 0.748 ± 0.025    | 478.28                       | 639.59                                          |
| LmGSTS2  | 1.047 ± 0.092     | 1,124.79                      | 1074.03                                          | 0.890 ± 0.042    | 997.15                       | 1,120.49                                        |
| LmGSTS3  | 0.217 ± 0.023     | 2,030.00                      | 9,339.88                                         | 0.569 ± 0.020    | 3,818.57                     | 6,711.74                                        |
| LmGSTS4  | 1.292 ± 0.070     | 471.23                        | 364.60                                           | 0.365 ± 0.033    | 392.40                       | 1,074.43                                        |
| LmGSTS5  | 0.253 ± 0.026     | 6,673.54                      | 26,333.24                                        | 0.555 ± 0.046    | 14,499.79                    | 26,138.66                                       |
| LmGSTS7  | 0.046 ± 0.001     | 1,730.32                      | 37,678.86                                        | 0.034 ± 0.001    | 8,683.39                     | 258,052.90                                      |
| LmGSTS8  | 0.100 ± 0.006     | 84.84                         | 850.60                                           | 0.742 ± 0.028    | 251.30                       | 338.75                                          |
| LmGSTS9  | 0.351 ± 0.026     | 1,646.38                      | 4,692.93                                         | 0.533 ± 0.033    | 3,039.24                     | 5,702.23                                        |
| LmGSTS10 | 0.311 ± 0.018     | 2,228.91                      | 7,172.99                                         | 1.547 ± 0.076    | 6,555.24                     | 4,236.67                                        |
| LmGSTT1  | 0.260 ± 0.014     | 996.50                        | 3,836.04                                         | 15.902 ± 1.394   | 26286.68                     | 1,653.10                                        |
| LmGSTT2  | 0.393 ± 0.049     | 1,203.61                      | 3,059.60                                         | 0.527 ± 0.023    | 1,997.86                     | 3,791.14                                        |
| LmGSTO1  | 0.228 ± 0.045     | 32.65                         | 143.01                                           | 5.186 ± 0.476    | 114.43                       | 27.85                                           |
| LmGSTO2  | 0.841 ± 0.138     | 68.10                         | 80.98                                            | 3.301 ± 0.245    | 74.97                        | 22.72                                           |
| LmGSTO3  | 0.216 ± 0.004     | 221.38                        | 1022.63                                          | 5.577 ± 0.287    | 953.23                       | 170.91                                          |
| LmGSTZ1  | 0.452 ± 0.058     | 100.01                        | 221.47                                           | 0.531 ± 0.015    | 71.95                        | 135.55                                          |

The units are as follows:  $V_{max}$ ,  $\mu\text{mol}/\text{min}/\text{mg}$ ;  $k_{cat}$ ,  $s^{-1}$ ;  $K_m$ , mM;  $k_{cat}/K_m$ ,  $mM^{-1} s^{-1}$ . The data are the means  $\pm$  SD for at least three independent experiments.

doi:10.1371/journal.pone.0114776.t003

(675.4-fold among the delta class, 103.3-fold among the sigma class, 12.6-fold among the omega class, and 6.0-fold among the epsilon class). On the other hand, the apparent  $K_m^{GSH}$  varied <50-fold among the GST classes (45.5-fold among the sigma class, 30.2-fold among the theta class, 8.7-fold among the delta class, and 1.6-fold among the epsilon class). By contrast, the catalytic efficiency ( $k_{cat}/K_m$ ) of GSH differed markedly among the GST classes (2482.4-fold among the delta class, 761.8-fold among the sigma class, 7.5-fold among the omega class, and 6.3-fold among the epsilon class).

The observed variations of enzyme catalytic properties not only reflect environmental changes in the GSTs active site, but also embody the diversity of the physiological substrates. This may partially explain why insects possess so many different GSTs.

## Positive selective sites of GSTs from *L. migratoria*

In order to detect the influence of selection in the delta GSTs, we used branch method to detect selective pressure [27–29]. Under the one-ratio model, the log-likelihood values were  $\ln L = -4573.55$ , with estimates of  $\omega = 0.10449$  for the delta GSTs. Under the free-ratio model, the log-likelihood values were  $\ln L = -4558.31$  for the delta GSTs. The LRTs of the 2 assumptions indicated that the free-ratio model was significantly more likely ( $P < 0.01$ ) for the delta GSTs, implying that the selective pressure varied among branches. The estimated  $\omega$  values in most branches of the delta GSTs were  $< 1$ , indicating that the GST genes in the delta GST had been under purifying selection. The three tests, 0-A, 0-B, and 0-C, suggested that  $\omega_A$ ,  $\omega_B$  and  $\omega_C$  were significantly greater than the background ratio  $\omega_0$  (Table 4). While the other three tests, A-A', B-B', and C-C', suggested that  $\omega_A$ ,  $\omega_B$  and  $\omega_C$  were also significantly greater than one. These results suggested that the three major branches of delta class were under positive selection pressure.

Our present results focused on whether the specific sites have undergone positive selection. Therefore, we chose 5 models of CODEML to detect positive selection sites. We conducted 2 LRTs, which compared M1a with M2a, and M7 with M8, to test whether each GST class had evolved under positive selection (Table 5 and S5 Data). The one-ratio model (M0) yielded estimated  $\omega$  values of 10.449% for the delta GSTs; this result implied that, on average, negative selection played a dominant role during evolution. We further showed that the M8 model was considerably better than the M7 model for delta GSTs, and provided strong evidence for positive selection. Under the M8 model, 0.7% of delta sites were positively selected. Further, the results of BEB analysis revealed that 4 amino acid sites of the delta GSTs were identified as positive selection sites. Among the 4 candidate sites, 2 sites (I193 and T199) were located in the C-domain of GSTs, whereas the other 2 sites (V9 and G11) were located in the N-domain of GSTs.

The results of protein 3-dimensional-structure modeling suggested that the overall structures of the delta GSTs, which are involved in positive selection pressure, were relatively conserved, especially regarding the  $\beta$ -sheet and  $\alpha$ -helix (S3 Figure). Therefore, in order to clearly display detailed protein structures, we selected the homology structure of LmGSTD1 as a representative structure, and used the structure to label the positive selection sites (Fig. 4). We observed that most of the positive selection sites were situated either at the functional  $\alpha$ -helix or at nearby essential sites. For instance, in delta GSTs, the V9 and G11 sites were close not only to the G-site, but also to the dimer interface. Further, the T199 site was close to the interface between the N- and C-domain residues.

## Discussion

In the present study, we identified and sequenced cDNAs putatively encoding 28 cytosolic GSTs and 4 microsomal GSTs based on the transcriptome database. Our phylogenetic analysis revealed that the 28 cytosolic GSTs belonging to 6 different cytosolic classes (sigma, epsilon, delta, omega, theta, and zeta), and the 4

**Table 4.** Likelihood ratio tests for delta GST genes under branch model.

|    | Model                   | -lnL    | Model compared | $\chi^2$ | P        |
|----|-------------------------|---------|----------------|----------|----------|
| 0  | One-ratio               | 4573.55 |                |          |          |
| 1  | Free-ratio              | 4558.31 | 0 and 1        | 30.48    | <0.001** |
|    | Two-ratio               |         |                |          |          |
| A  | Branch A,               | 4570.59 | 0 and A        | 5.92     | <0.05*   |
| B  | Branch B,               | 4566.61 | 0 and B        | 13.88    | <0.001** |
| C  | Branch C                | 4562.01 | 0 and C        | 23.08    | <0.001** |
| A' | Branch A', $\omega_A=1$ | 4585.05 | A' and A       | 28.92    | <0.001** |
| B' | Branch B', $\omega_B=1$ | 4631.91 | B' and B       | 130.60   | <0.001** |
| C' | Branch C', $\omega_C=1$ | 4637.80 | C' and C       | 151.58   | <0.001** |

Branch A (*LmGSTd7*), branch B (*LmGSTd1* and *LmGSTd5*), branch C (*LmGSTd2*, *LmGSTd3*, *LmGSTd4* and *LmGSTd6*). Phylogenetic analysis of delta GSTs from *L. migratoria* are shown in [S4 Figure](#). All data are present in [S5 Data](#).

doi:10.1371/journal.pone.0114776.t004

microsomal GSTs belonging to 2 classes—class 1 (insect subclass) and class 3 (MGST3 subclass). The sigma class (10 members), delta class (7 members), epsilon class (5 members), and omega class (3 members) have apparently undergone gene expansion. However, it remains unclear whether these genes play different roles in different tissues and at different developmental stages. To explore these matters, we determined the gene expression patterns at the mRNA level, and the enzymatic properties at the protein level.

We observed 12 GSTs highly expressed during the egg stage. Among the GSTs that were highly expressed in the egg stage, some showed a high expression level in the early egg stage, others were primarily expressed in the late egg stage, and others were expressed in both the early and late stages ([Fig. 3C](#)). Because egg is a non-mobile and non-feeding stage, expression of these genes may imply their roles in metabolizing endogenous substances during the embryonic development.

**Table 5.** Parameter estimates and likelihood ratio tests for delta GST genes under site model.

| Model                   | Estimates of parameters                                                                                       | -lnL    | $\chi^2$ | P      | Positively Selected Sites                      |
|-------------------------|---------------------------------------------------------------------------------------------------------------|---------|----------|--------|------------------------------------------------|
| M0                      | 0.10449                                                                                                       | 4573.55 |          |        |                                                |
| M1a (nearlyneutral)     | $p_0=0.81853$ , $p_1=0.18147$<br>$\omega_0=0.06960$ , $\omega_1=1.00000$                                      | 4530.57 |          |        |                                                |
| M2a (positiveselection) | $p_0=0.81853$ , $p_1=0.00226$ , $p_2=0.17920$<br>$\omega_0=0.06960$ , $\omega_1=1.00000$ , $\omega_2=1.00000$ | 4530.57 | 0        | 1.00   |                                                |
| M7 ( $\beta$ )          | $P=1.01633$ , $q=6.34930$                                                                                     | 4502.29 |          |        | N-domain V9                                    |
| M8 ( $\beta&\omega$ )   | $p_0=0.97058$ , $P=1.12764$ , $q=8.41813$<br>( $p_1=0.02942$ ), $\omega=105.37152$                            | 4499.13 | 6.32     | <0.05* | N-domain G11<br>C-domain I193<br>C-domain T199 |

Numbering is according to the amino sequence of *LmGSTD1*. All data are present in [S5 Data](#).

doi:10.1371/journal.pone.0114776.t005



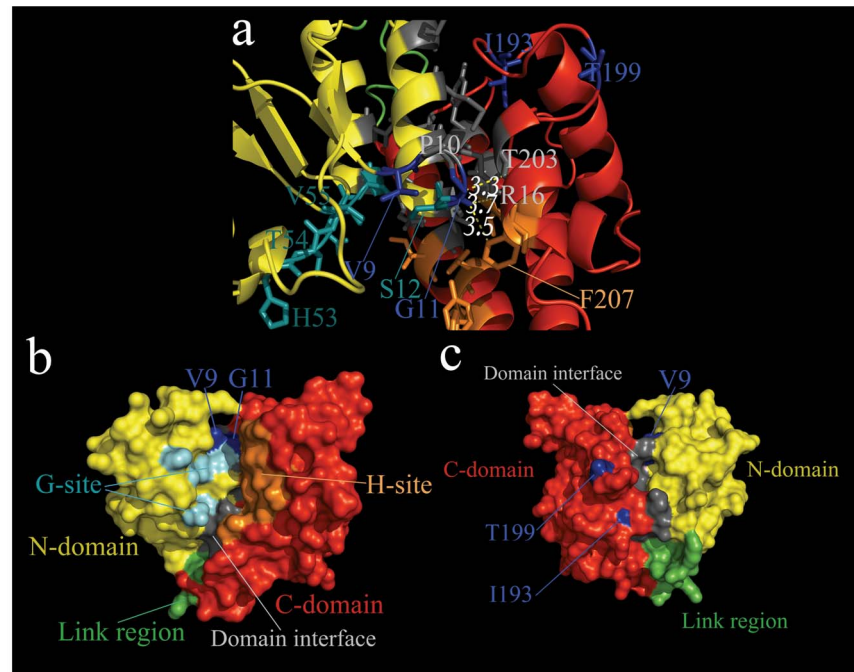

**Fig. 4. Homology structure of delta and sigma class GSTs from *L. migratoria*.** **a**, Ribbon representation of the 3D-structures of LmGSTD1. **b**, **c** Surface representation of LmGSTD1 (**b** front, **c** back). *N*-domain, *C*-domain and link region are colored yellow, red and green, respectively. The glutathione binding site (G-site), the hydrophobic ligand binding site (H-site) and the positive selective sites are labeled with cyan, orange and blue, respectively. The residues located at the interface of the *N*- and *C*-domain are shown in gray. In order to conspicuously display structure details, the homology structure of LmGSTD1 were selected as representative structure of each class in ribbon and surface representation.

doi:10.1371/journal.pone.0114776.g004

Other GSTs were mainly expressed in the larval and adult stages, and are therefore more likely responsible for detoxification in the larval and adult stages.

Tissue-specific expressed GSTs may play a vital part in the respective organs or tissues through their detoxification activity. For instance, the pi, rho, and omega GSTs of coho salmon (*Oncorhynchus kisutch*) are located in the olfactory rosettes and are critical to maintaining olfaction [30]. GSTM1 is situated in the mouse aorta, and regulates the proliferation and migration of vascular smooth muscle cells [31]. The expression level of omega GSTs in the human brain is associated with risk of Alzheimer's and Parkinson's disease [32]. The existence of differential gene expression profiles of locust GSTs suggests that their detoxification abilities are restricted within corresponding tissues or organs, according to physiological demands or regulation mechanisms *in vivo*. In the present study, we observed differences in the substrate specificities and steady kinetic constants of locust GSTs. The architecture of the functional region may have been altered by amino acid substitutions. The G-site residues of the *N*-terminal domain are known to be relatively conserved; on the other hand, the H-site residues of the *C*-terminal domain are relatively flexible, thereby contributing to adaptation to a wider spectrum of toxic reagents. Classic studies in the literature have paid more

attention to the obvious functional changes caused by amino acid replacements in critical regions [33]. A single amino acid replacement located directly in the active site can markedly alter the substrate specificity of *N*-acetyl-L-ornithine transcarbamylase and *N*-succinyl-L-ornithine transcarbamylase [34]. Similarly, 6 substitutions located directly in the adenosine-binding pocket of *E. coli* isocitrate dehydrogenase systematically inverted coenzyme specificity [35]. The results of recent studies have shown that mutations located close to the active sites and other functional regions can alter the substrate preference or catalytic activity. In pine, tau GSTs contains positively selected residues located adjacent to the G-site or distant from the active center, and are related to the enzymatic activities [33]. Mutations of superoxide dismutase also indicated that residues located close to the active site can markedly alter the catalytic efficiency [36]. These observations imply that the positively selected residues of the delta GSTs, which are located close to essential catalytic residues, represent a mechanism for substrate diversity of the GSTs family [33]. The active sites of GSTs require specific amino acid residues and accurate orientation in protein structures, thereby resulting in greater functional and structural constraints. On the other hand, the protein surface region is generally relatively flexible. This may explain why the 4 positive selection sites of the delta class were spread on protein surface.

## Supporting Information

**S1 Figure. Alignment of amino acid sequences of GSTs from *L. migratoria*.** The glutathione binding site (G-site), the hydrophobic ligand binding site (H-site) and the positive selective sites are labeled with green, red and blue square, respectively. The residues located at the interface of the N- and C-terminal domain and dimer interface are label with orange and pink square, respectively.

[doi:10.1371/journal.pone.0114776.s001](https://doi.org/10.1371/journal.pone.0114776.s001) (PDF)

**S2 Figure. Prediction of transmembrane segments of microsomal GSTs from *L. migratoria*.** A: *LmGSTm1*, B: *LmGSTm2*, C: *LmGSTm3*, D: *LmGSTm4*.

[doi:10.1371/journal.pone.0114776.s002](https://doi.org/10.1371/journal.pone.0114776.s002) (TIF)

**S3 Figure. Superimposed homology structure of delta class GSTs.** N-domain, C-domain and link region are colored yellow, red and green, respectively.

[doi:10.1371/journal.pone.0114776.s003](https://doi.org/10.1371/journal.pone.0114776.s003) (TIF)

**S4 Figure. Phylogenetic analysis of delta GSTs from *L. migratoria*.** The bootstrap neighbor-joining tree was generated using MEGA from ClustalW alignments. Branch numbers represent bootstrap values (1000 replicates). Branch A, branch B and branch C are labeled with A, B, C

[doi:10.1371/journal.pone.0114776.s004](https://doi.org/10.1371/journal.pone.0114776.s004) (TIF)

**S1 Table. Primer sequence for Real-time PCR analysis.**

[doi:10.1371/journal.pone.0114776.s005](https://doi.org/10.1371/journal.pone.0114776.s005) (DOC)

**S2 Table. Comparison of GST gene number from *L. migratoria* and five insects.**

[doi:10.1371/journal.pone.0114776.s006](https://doi.org/10.1371/journal.pone.0114776.s006) (DOC)

**S1 Data. Analysis of *L. migratoria* transcriptome.**

[doi:10.1371/journal.pone.0114776.s007](https://doi.org/10.1371/journal.pone.0114776.s007) (PDF)

**S2 Data. Sequences of *L. migratoria* GSTs.**

[doi:10.1371/journal.pone.0114776.s008](https://doi.org/10.1371/journal.pone.0114776.s008) (DOC)

**S3 Data. Sequences of cytosolic GSTs used for phylogenetic analysis.**

[doi:10.1371/journal.pone.0114776.s009](https://doi.org/10.1371/journal.pone.0114776.s009) (DOC)

**S4 Data. Sequences of microsomal GSTs used for phylogenetic analysis.**

[doi:10.1371/journal.pone.0114776.s010](https://doi.org/10.1371/journal.pone.0114776.s010) (DOC)

**S5 Data. Output file from PAML.**

[doi:10.1371/journal.pone.0114776.s011](https://doi.org/10.1371/journal.pone.0114776.s011) (RAR)

## Acknowledgments

We would like to thank Juncheng Zhang for his help with data analysis.

## Author Contributions

Conceived and designed the experiments: KYZ JZZ EBM XYZ. Performed the experiments: XYZ JXW. Analyzed the data: MZ XYZ. Contributed reagents/materials/analysis tools: DQL GHQ. Wrote the paper: XYZ.

## References

1. Yang ML, Zhang JZ, Zhu KY, Xuan T, Liu XJ, et al. (2009) Mechanisms of organophosphate resistance in a field population of oriental migratory locust, *Locusta migratoria manilensis* (Meyen). Archives of Insect Biochemistry and Physiology 71: 3–15.
2. Qin G, Jia M, Liu T, Zhang X, Guo Y, et al. (2013) Characterization and Functional Analysis of Four Glutathione S-Transferases from the Migratory Locust, *Locusta migratoria*. PLoS ONE 8: e58410.
3. Zhang X, Li T, Zhang J, Li D, Guo Y, et al. (2012) Structural and catalytic role of two conserved tyrosines in delta-class glutathione S-transferase from *Locusta migratoria*. Archives of Insect Biochemistry and Physiology 80: 77–91.
4. Qin G, Jia M, Liu T, Xuan T, Zhu K, et al. (2011) Identification and characterisation of ten glutathione S-transferase genes from oriental migratory locust, *Locusta migratoria manilensis* (Meyen). Pest Management Science 67: 697–704.
5. Li X, Zhang X, Zhang J, Zhang X, Starkey SR, et al. (2009) Identification and characterization of eleven glutathione S-transferase genes from the aquatic midge *Chironomus tentans* (Diptera: Chironomidae). Insect Biochemistry and Molecular Biology 39: 745–754.
6. Sheehan D, Meade G, Foley VM, Dowd CA (2001) Structure, function and evolution of glutathione transferases: implications for classification of non-mammalian members of an ancient enzyme superfamily. Biochem J 360: 1–16.
7. Yu Q, Lu C, Li B, Fang S, Zuo W, et al. (2008) Identification, genomic organization and expression pattern of glutathione S-transferase in the silkworm, *Bombyx mori*. Insect Biochemistry and Molecular Biology 38: 1158–1164.
8. Wang Y, Qiu L, Ranson H, Lumjuan N, Hemingway J, et al. (2008) Structure of an insect epsilon class glutathione S-transferase from the malaria vector *Anopheles gambiae* provides an explanation for the high DDT-detoxifying activity. Journal of Structural Biology 164: 228–235.

9. **Mounsey K, Pasay C, Arlian L, Morgan M, Holt D, et al.** (2010) Increased transcription of Glutathione S-transferases in acaricide exposed scabies mites. *Parasites & Vectors* 3: 43.
10. **Qin G, Jia M, Liu T, Zhang X, Guo Y, et al.** (2012) Heterologous expression and characterization of a sigma glutathione S-transferase involved in carbaryl detoxification from oriental migratory locust, *Locusta migratoria manilensis* (Meyen). *Journal of Insect Physiology* 58: 220–227.
11. **Yu X, Sun R, Yan H, Guo X, Xu B** (2012) Characterization of a sigma class glutathione S-transferase gene in the larvae of the honeybee (*Apis cerana cerana*) on exposure to mercury. *Comparative Biochemistry and Physiology Part B: Biochemistry and Molecular Biology* 161: 356–364.
12. **Ren H, Xu D, Gopalakrishnan S, Qiao K, Huang W-B, et al.** (2009) Gene cloning of a sigma class glutathione S-transferase from abalone (*Haliotis diversicolor*) and expression analysis upon bacterial challenge. *Developmental & Comparative Immunology* 33: 980–990.
13. **Flanagan JU, Smythe ML** (2011) Sigma-class glutathione transferases. *Drug Metabolism Reviews* 43: 194–214.
14. **Board PG, Anders MW** (2011) Glutathione transferase zeta: discovery, polymorphic variants, catalysis, inactivation, and properties of *Gstz1<sup>-/-</sup>* mice. *Drug Metabolism Reviews* 43: 215–225.
15. **Bresell A, Weinander R, Lundqvist G, Raza H, Shimoji M, et al.** (2005) Bioinformatic and enzymatic characterization of the MAPEG superfamily. *FEBS Journal* 272: 1688–1703.
16. **Frova C** (2006) Glutathione transferases in the genomics era: New insights and perspectives. *Biomolecular Engineering* 23: 149–169.
17. **Siritantikorn A, Johansson K, Ahlen K, Rinaldi R, Suthiphongchai T, et al.** (2007) Protection of cells from oxidative stress by microsomal glutathione transferase 1. *Biochemical and Biophysical Research Communications* 355: 592–596.
18. **Johansson K, Järvliden J, Gogvadze V, Morgenstern R** (2010) Multiple roles of microsomal glutathione transferase 1 in cellular protection: A mechanistic study. *Free Radical Biology and Medicine* 49: 1638–1645.
19. **Kojima F, Kato S, Kawai S** (2005) Prostaglandin E synthase in the pathophysiology of arthritis. *Fundamental & Clinical Pharmacology* 19: 255–261.
20. **Yamada T, Takusagawa F** (2007) PGH2 Degradation Pathway Catalyzed by GSH–Heme Complex Bound Microsomal Prostaglandin E2 Synthase Type 2: The First Example of a Dual-Function Enzyme. *Biochemistry* 46: 8414–8424.
21. **Schröder O, Sjöström M, Qiu H, Stein J, Jakobsson P-J, et al.** (2003) Molecular and catalytic properties of three rat leukotriene C4 synthase homologs. *Biochemical and Biophysical Research Communications* 312: 271–276.
22. **Eswar N, Webb B, Marti-Renom MA, Madhusudhan MS, Eramian D, et al.** (2001) Comparative Protein Structure Modeling Using MODELLER. *Current Protocols in Protein Science*.
23. **Yang Z** (2007) PAML 4: Phylogenetic Analysis by Maximum Likelihood. *Molecular Biology and Evolution* 24: 1586–1591.
24. **Yang Z, Nielsen R, Goldman N, Pedersen A-MK** (2000) Codon-Substitution Models for Heterogeneous Selection Pressure at Amino Acid Sites. *Genetics* 155: 431–449.
25. **Yang Z, Wong WSW, Nielsen R** (2005) Bayes Empirical Bayes Inference of Amino Acid Sites Under Positive Selection. *Molecular Biology and Evolution* 22: 1107–1118.
26. **Wang X, Fang X, Yang P, Jiang X, Jiang F, et al.** (2014) The locust genome provides insight into swarm formation and long-distance flight. *Nat Commun* 5.
27. **Shen T, Xu S, Wang X, Yu W, Zhou K, et al.** (2012) Adaptive evolution and functional constraint at TLR4 during the secondary aquatic adaptation and diversification of cetaceans. *BMC Evolutionary Biology* 12: 39.
28. **Yang Z** (1998) Likelihood ratio tests for detecting positive selection and application to primate lysozyme evolution. *Molecular Biology and Evolution* 15: 568–573.
29. **Osorio D, Antunes A, Ramos M** (2007) Structural and functional implications of positive selection at the primate angiogenin gene. *BMC Evolutionary Biology* 7: 167.

30. **Espinoza HM, Shireman LM, McClain V, Atkins W, Gallagher EP** (2013) Cloning, expression and analysis of the olfactory glutathione S-transferases in coho salmon. *Biochemical Pharmacology* 85: 839–848.
31. **Yang Y, Parsons KK, Chi L, Malakauskas SM, Le TH** (2009) Glutathione S-Transferase- $\mu$ 1 Regulates Vascular Smooth Muscle Cell Proliferation, Migration, and Oxidative Stress. *Hypertension* 54: 1360–1368.
32. **Mariet A, Fanggeng Z, High C, Curtis SY, Richard M, et al.** (2012) Glutathione S-transferase omega genes in Alzheimer and Parkinson disease risk, age-at-diagnosis and brain gene expression: an association study with mechanistic implications. *Molecular Neurodegeneration* 7: 13–13.
33. **Lan T, Wang X, Zeng Q** (2013) Structural and Functional Evolution of Positively Selected Sites in Pine Glutathione S-Transferase Enzyme Family. *Journal of Biological Chemistry* 288: 24441–24451.
34. **Shi D, Yu X, Cabrera-Luque J, Chen TY, Roth L, et al.** (2007) A single mutation in the active site swaps the substrate specificity of *N*-acetyl-L-ornithine transcarbamylase and *N*-succinyl-L-ornithine transcarbamylase. *Protein Science* 16: 1689–1699.
35. **Chen R, Greer A, Dean AM** (1995) A highly active decarboxylating dehydrogenase with rationally inverted coenzyme specificity. *Proceedings of the National Academy of Sciences* 92: 11666–11670.
36. **Zhou H, Wong K, Vijayakumar M** (1997) Design of fast enzymes by optimizing interaction potential in active site. *Proceedings of the National Academy of Sciences* 94: 12372–12377.
