# Supplementary material for: Molecular Cloning, Characterization and Positively Selected Sites of the Glutathione S-Transferase Family from Locusta migratoria
Source: PubMed Central journal article supplement (PMC4259467; doi:10.1371/journal.pone.0114776), 2014-12-08

# A

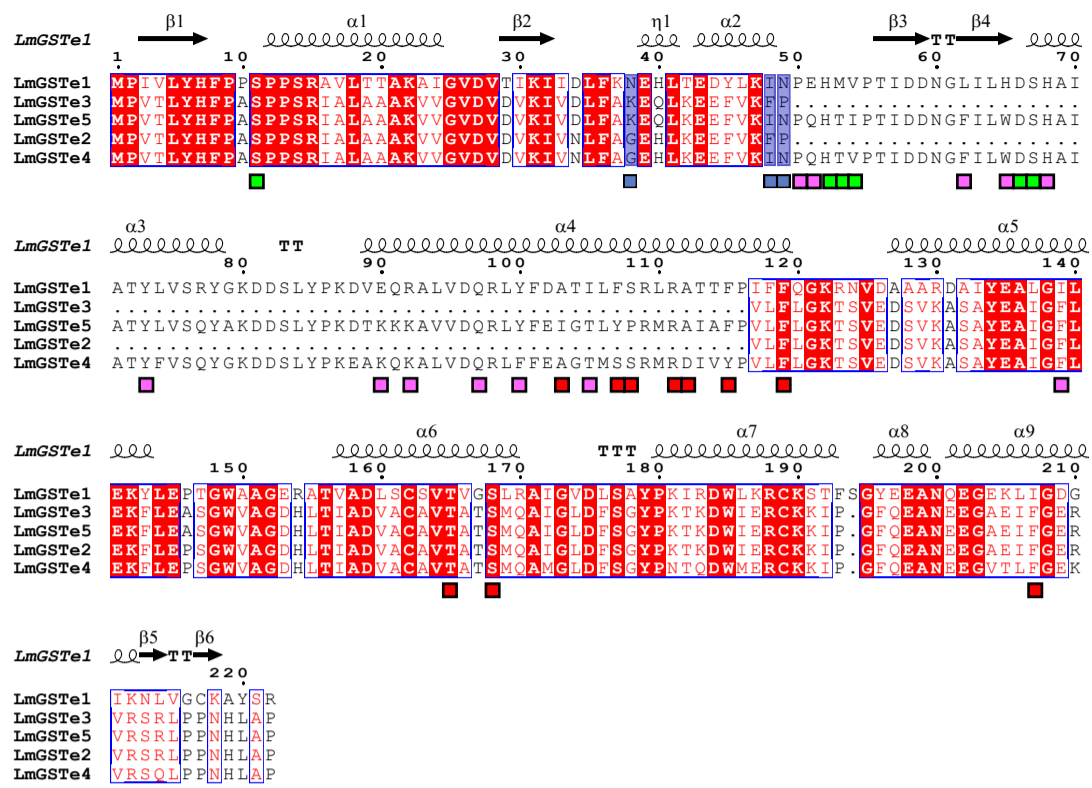

# B

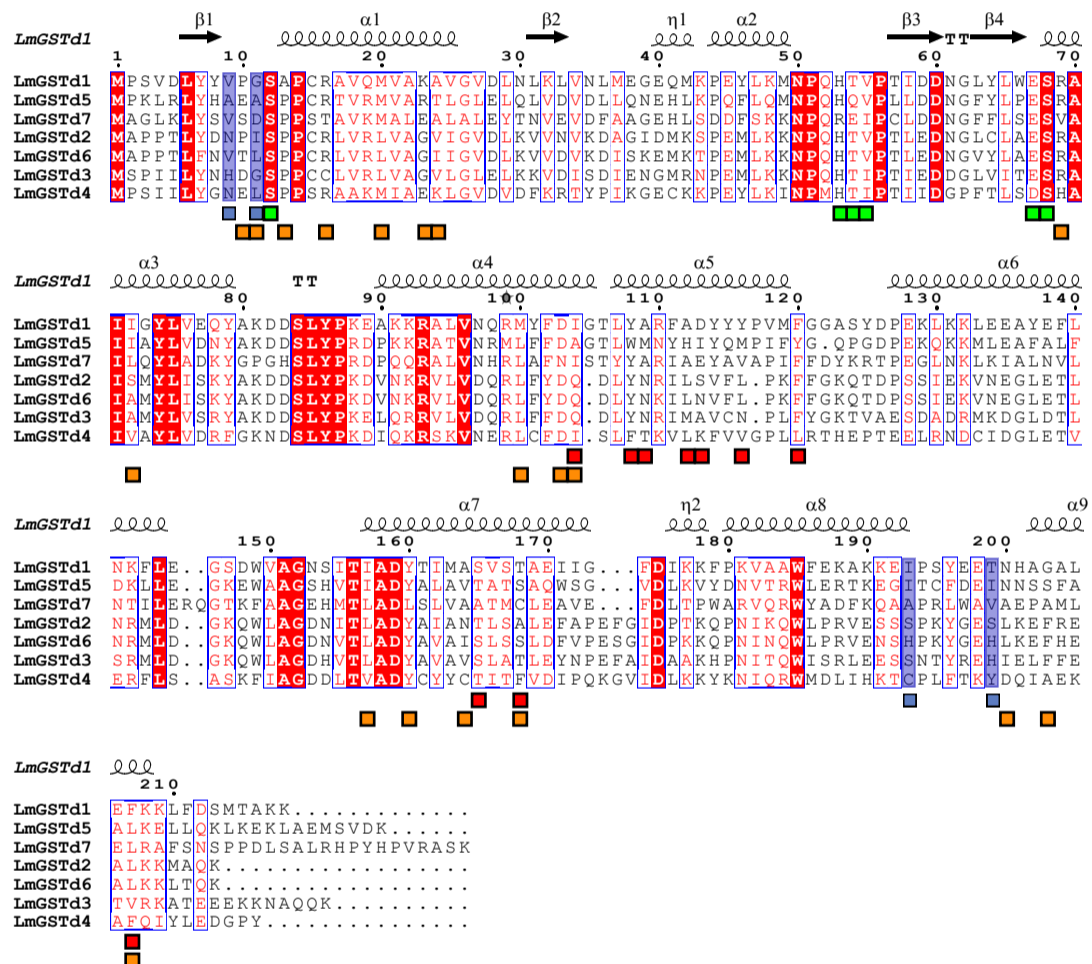

# C

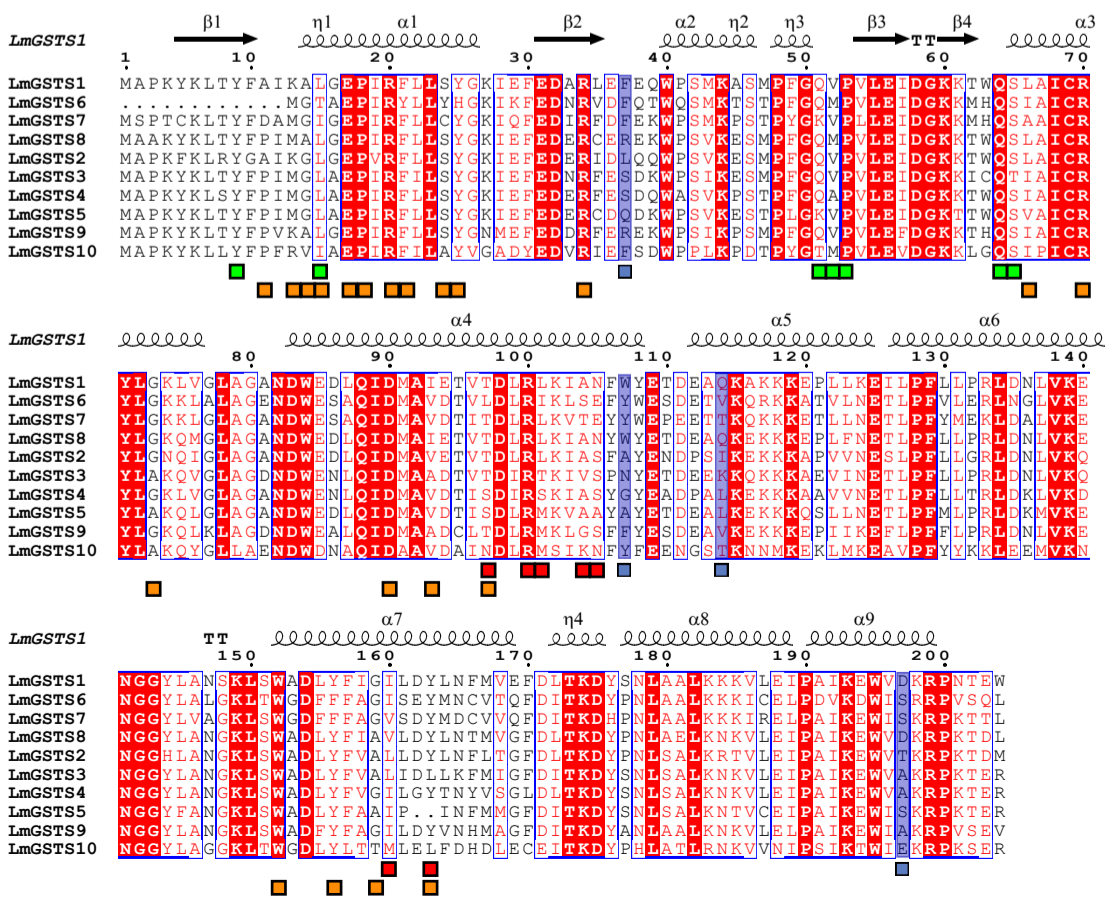

Supplement: pone.0114776.s001.pdf [file pone.0114776.s001.pdf]
